# Supplementary material for: Determinants of Lipid Parameters in Patients without Diagnosed Cardiovascular Disease—Results of the Polish Arm of the EUROASPIRE V Survey
Source: MDPI journal article supplement (doi:10.3390/jcm12072738), 2023-04-06
Supplement: s1 [file s1]

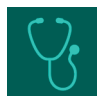

Supplementary Materials

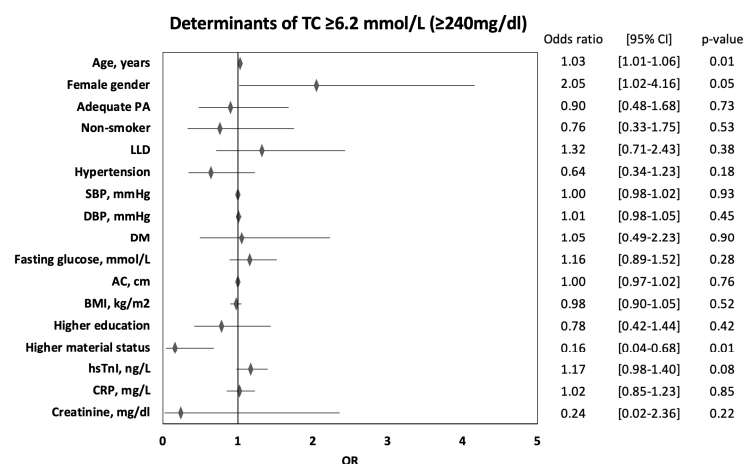

**Figure S1.** Determinants of TC  $\geq 6.2$  mmol/L ( $\geq 240$  mg/dl) based on the results of the univariate analysis.

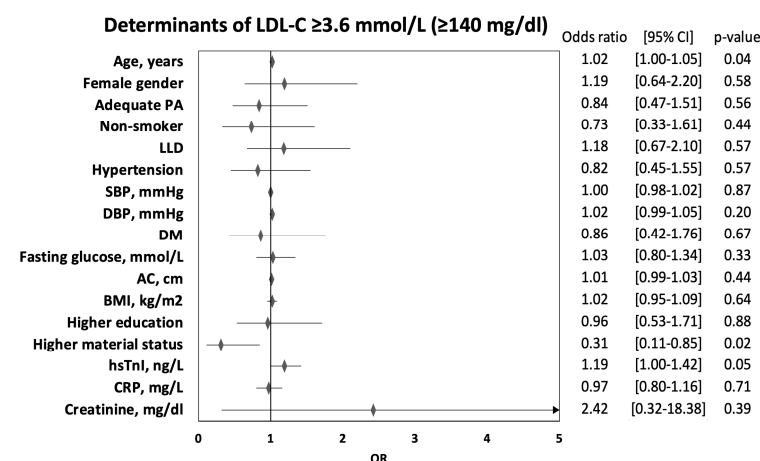

**Figure S2.** Determinants of LDL-C  $\geq 3.6$  mmol/L ( $\geq 140$  mg/dl) based on the results of the univariate analysis.

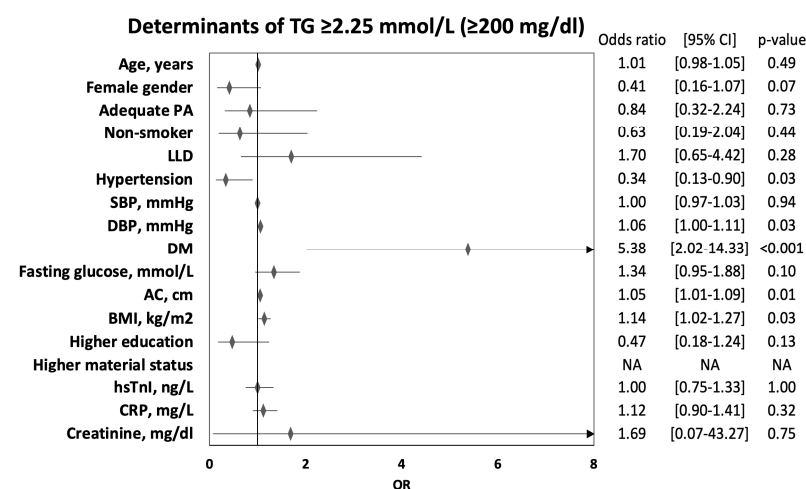

**Figure S3.** Determinants of TG  $\geq 2.25$  mmol/L ( $\geq 200$  mg/dl) based on the results of the univariate analysis.

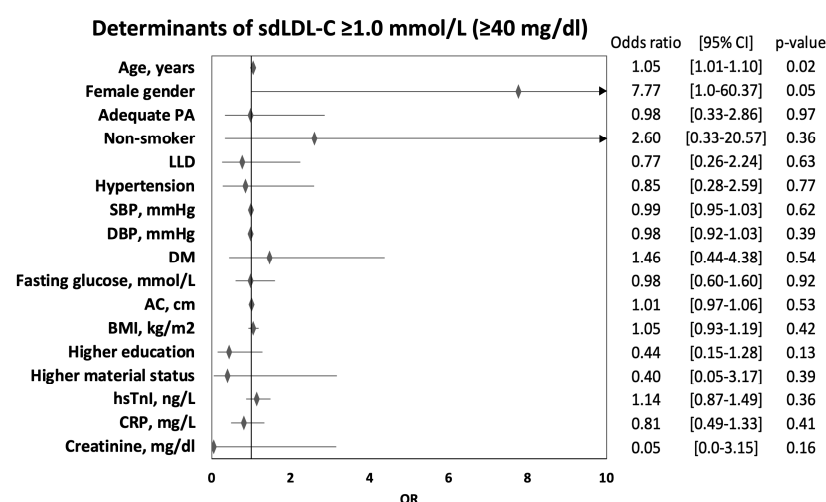

**Figure S4.** Determinants of sdLDL-C  $\geq 1.0$  mmol/L ( $\geq 40$  mg/dl) based on the results of the univariate analysis.

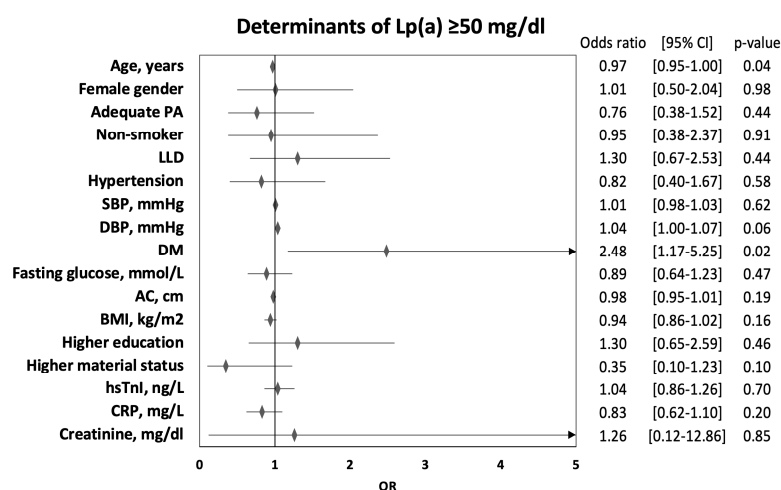

**Figure S5.** Determinants of Lp(a)  $\geq 50$  mg/dl based on the results of the univariate analysis.

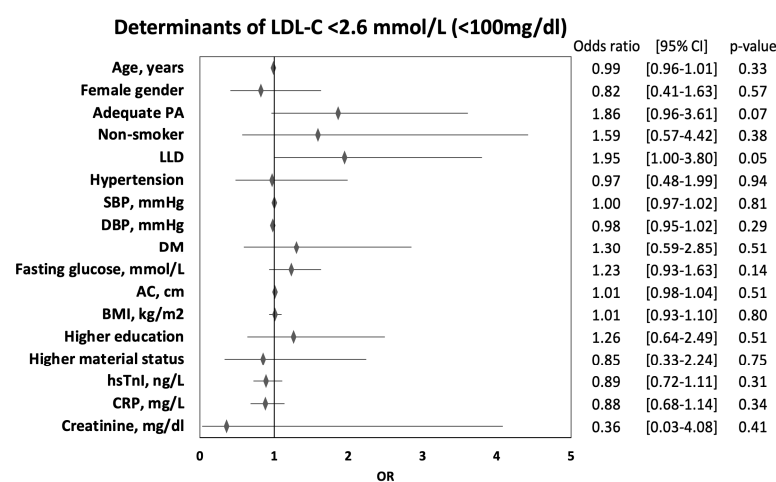

**Figure S6.** Determinants of LDL-C  $< 2.6$  mmol/L ( $< 100$  mg/dl) based on the results of the univariate analysis.

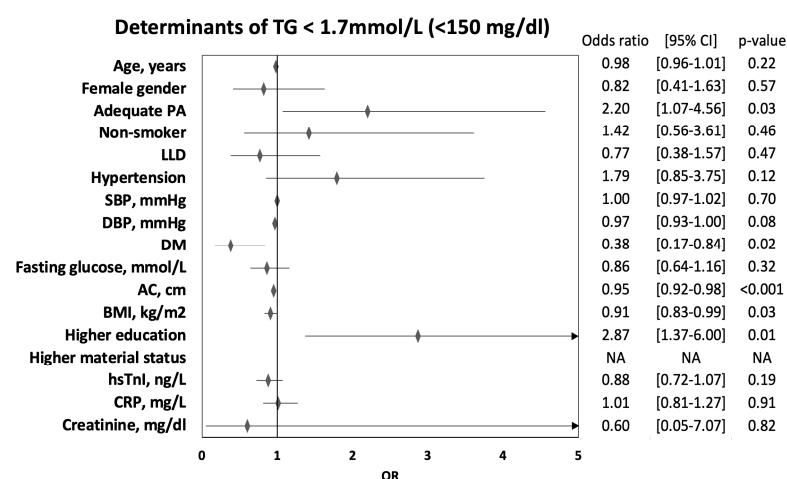

**Figure S7.** Determinants of TG <1.7 mmol/L (<150 mg/dl) based on the results of the univariate analysis.

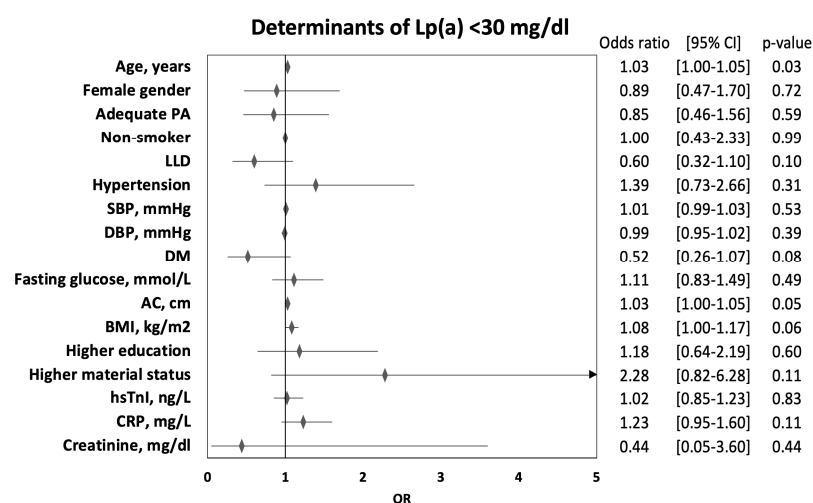

**Figure S8.** Determinants of Lp(a) <30 mg/dl based on the results of the univariate analysis.
